# Supplementary material for: Removal of 26 corticosteroids, potential COVID-19 remedies, at environmentally relevant concentrations in water using UV/free chlorine, UV/monochloramine, and UV/hydrogen peroxide
Source: Royal Society of Chemistry journal article supplement (doi:10.1039/d1ew00919b), 2022-01-01
Supplement: d1ew00919b1.pdf [file d1ew00919b1.pdf]

## Supplementary Information

### Removal of 26 corticosteroids, potential COVID-19 remedies, at environmentally relevant concentrations in water by UV/free chlorine, UV/monochloramine, and UV/hydrogen peroxide

Ai Zhang<sup>1</sup>, Yongqiang Ding<sup>1</sup>, Ai Jia<sup>2</sup>, Minkyu Park<sup>2</sup>, Kevin D. Daniels<sup>2</sup>, Xuhao Nie<sup>2</sup>,  
Shimin Wu<sup>2,3,\*</sup>, Shane A. Snyder<sup>2,\*</sup>

<sup>1</sup> *College of Environmental Science and Engineering, Donghua University, 2999 North Renmin Road, Shanghai 201620, China.*

<sup>2</sup> *Department of Chemical and Environmental Engineering, University of Arizona, 1133 E. James E. Rogers Way, Harshbarger 108, Tucson, AZ 85721-0011, United States.*

<sup>3</sup> *Jiangsu Shuangliang Environmental Technology Co., Ltd., Jiangyin, 214444, China.*

<sup>4</sup> *Nanyang Technological University, Nanyang Environment & Water Research Institute, 1 Cleantech Loop, CleanTech One, #06-08, 637141, Singapore.*

\*Corresponding author: Tel: +86 21 67792538; Fax: +86 21 67792522;

E-mail: [wushimin@gmail.com](mailto:wushimin@gmail.com) (Shimin Wu), [ssnyder@ntu.edu.sg](mailto:ssnyder@ntu.edu.sg) (Shane A. Snyder)

**14 Pages**

**4 Figures (S1-S4)**

**6 Tables (S1-S6)**

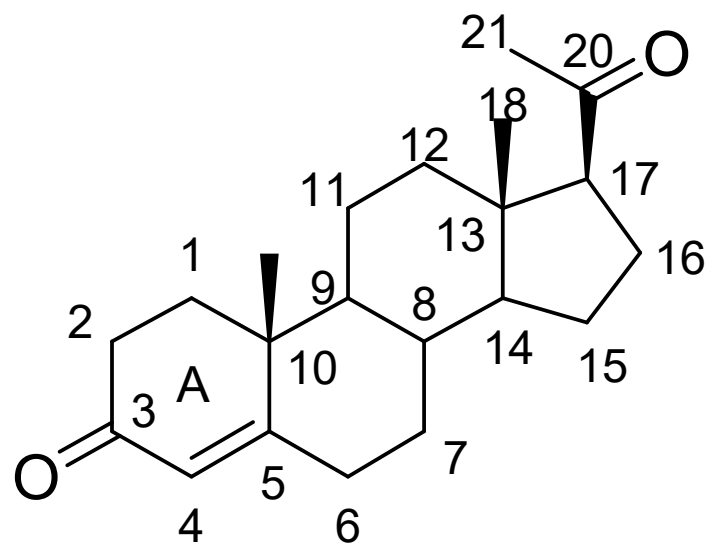

**Fig. S1** The structure and nomenclature of corticosteroids.

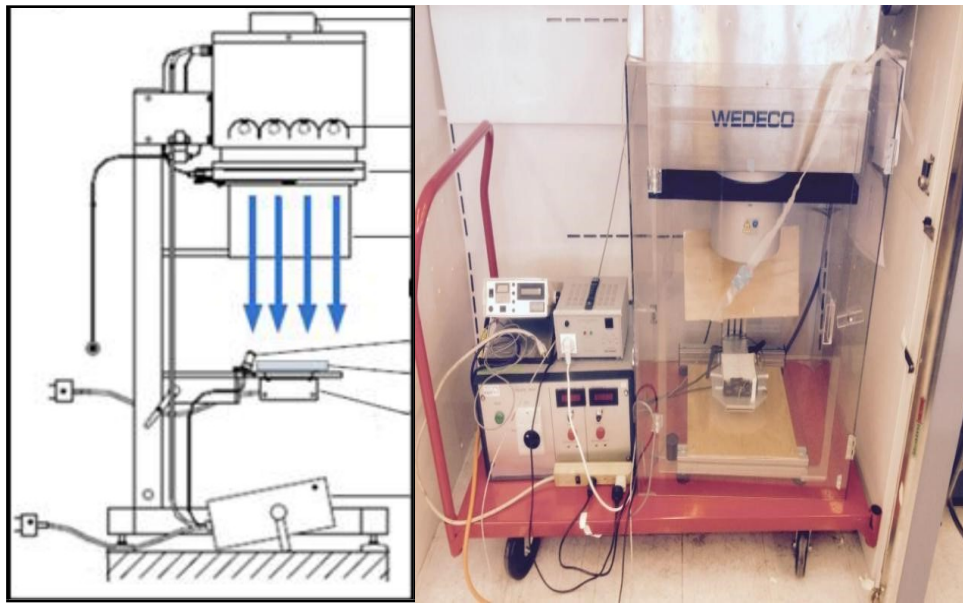

**Fig. S2** Experimental scheme of the collimated beam device (Taken from Bolton et al. 2002) and the UV lamp equipment for the experiment

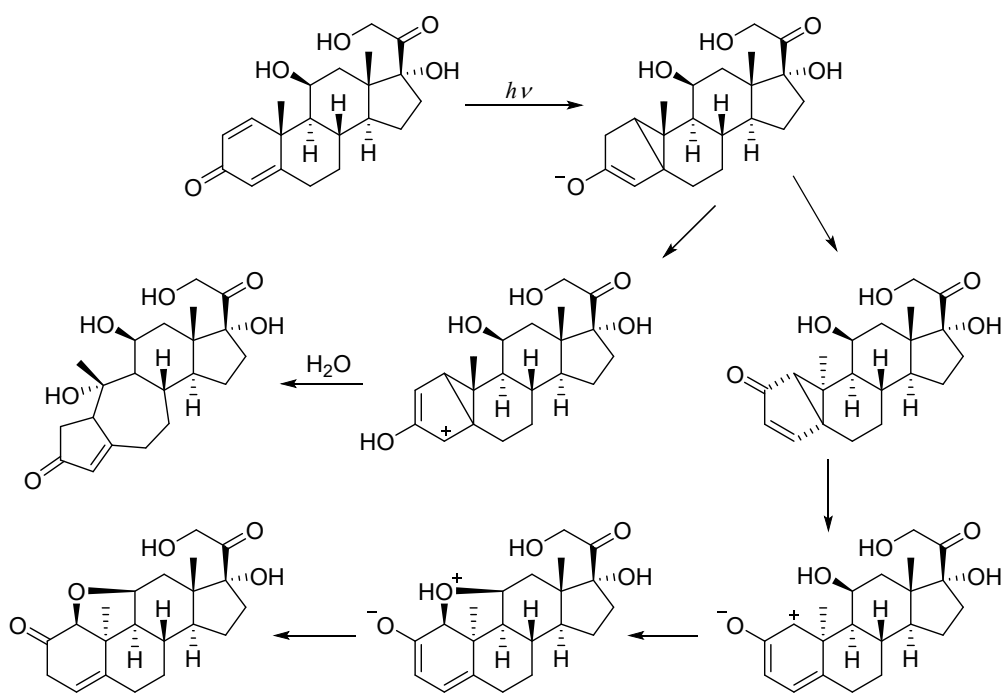

**Fig. S3** Mechanism of phototransformation of PNL (Taken from DellaGreca et al.

2004)

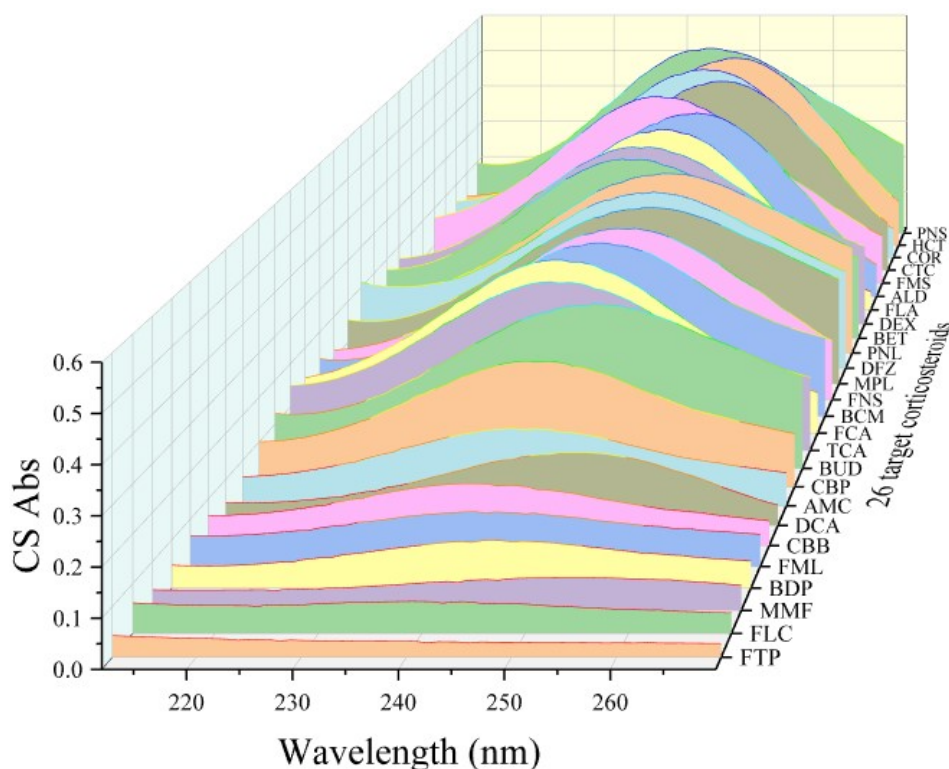

**Fig. S4** UV absorption spectra at 210-270 nm of CS contaminated water samples  
(initial CS concentration = 10 mg/L).

**Table S1** Water quality parameters of tested WWTP secondary effluent

| Parameters    | pH  | Conductivity<br>( $\mu\text{s}/\text{cm}$ ) | TOC*<br>(mg/L) | UV <sub>254</sub><br>( $\text{cm}^{-1}$ ) | NO <sub>3</sub> <sup>-</sup><br>(mg/L) | NO <sub>2</sub> <sup>-</sup><br>(mg/L) |
|---------------|-----|---------------------------------------------|----------------|-------------------------------------------|----------------------------------------|----------------------------------------|
| Water quality | 7.8 | 1108                                        | 4.4            | 0.14                                      | 5.4                                    | <0.1                                   |

\*Water was filtered with 0.7  $\mu\text{m}$  glass microfiber filters (GF/F, Whatman) before TOC measurement.

**Table S2** Optimized MRM conditions of target corticosteroids and surrogate standards

| Compound                       | Abbr. | Ret Time<br>(min) | Surrogate<br>Assignment | Prec Ion                                | Prod Ion <sup>a</sup>    | CE (V) | ESI Mode |
|--------------------------------|-------|-------------------|-------------------------|-----------------------------------------|--------------------------|--------|----------|
|                                |       |                   |                         | m/z (Formation)                         | m/z (RI, %) <sup>b</sup> |        |          |
| Aldosterone                    | ALD   | 5.36              | ALD-d <sub>7</sub>      | 359.2                                   | 331.2 (100)              | 12     | Neg      |
|                                |       |                   |                         | ([M-H] <sup>-</sup> )                   | 189.1 (35)               | 16     |          |
| Prednisolone                   | PNL   | 6.24              | HCT-d <sub>2</sub>      | 419.2                                   | 329.3 (100)              | 20     | Neg      |
|                                |       |                   |                         | ([M+CH <sub>3</sub> COO] <sup>-</sup> ) | 295.1 (17)               | 36     |          |
| Prednisone                     | PNS   | 6.37              | PNS-d <sub>8</sub>      | 417.2                                   | 327.2 (100)              | 12     | Neg      |
|                                |       |                   |                         | ([M+CH <sub>3</sub> COO] <sup>-</sup> ) | 357.3 (36)               | 4      |          |
| Hydrocortisone                 | HCT   | 6.38              | HCT-d <sub>2</sub>      | 421.2                                   | 331.3 (100)              | 16     | Neg      |
|                                |       |                   |                         | ([M+CH <sub>3</sub> COO] <sup>-</sup> ) | 297.3 (22)               | 36     |          |
| Cortisone                      | COR   | 6.70              | COR-d <sub>8</sub>      | 419.2                                   | 329.1 (100)              | 12     | Neg      |
|                                |       |                   |                         | ([M+CH <sub>3</sub> COO] <sup>-</sup> ) | 359.2 (33)               | 4      |          |
| 6 $\alpha$ -Methylprednisolone | MPL   | 8.87              | MPL-d <sub>2</sub>      | 433.2                                   | 343.1 (100)              | 20     | Neg      |
|                                |       |                   |                         | ([M+CH <sub>3</sub> COO] <sup>-</sup> ) | 309.1 (24)               | 36     |          |
| Betamethasone                  | BET   | 9.43              | BET-d <sub>5</sub>      | 451.2                                   | 361.1 (100)              | 12     | Neg      |
|                                |       |                   |                         | ([M+CH <sub>3</sub> COO] <sup>-</sup> ) | 307.1 (23)               | 36     |          |
| Dexamethasone                  | DEX   | 9.94              | DEX-d <sub>4</sub>      | 451.2                                   | 361.1 (100)              | 16     | Neg      |

| Compound                | Abbr. | Ret Time<br>(min) | Surrogate<br>Assignment           | Prec Ion<br>m/z (Formation)             | Prod Ion <sup>a</sup><br>m/z (RI, %) <sup>b</sup> | CE (V) | ESI Mode |
|-------------------------|-------|-------------------|-----------------------------------|-----------------------------------------|---------------------------------------------------|--------|----------|
|                         |       |                   |                                   | ([M+CH <sub>3</sub> COO] <sup>-</sup> ) | 307.1 (19)                                        | 36     |          |
| Flumethasone            | FMS   | 10.42             | BET-d <sub>5</sub>                | 469.2                                   | 379.1 (100)                                       | 12     | Neg      |
|                         |       |                   |                                   | ([M+CH <sub>3</sub> COO] <sup>-</sup> ) | 305.0 (17)                                        | 40     |          |
| Corticosterone          | CTC   | 10.44             | MPL-d <sub>2</sub>                | 347.2                                   | 329.2 (100)                                       | 12     | Pos      |
|                         |       |                   |                                   | ([M+H] <sup>+</sup> )                   | 120.9 (75)                                        | 24     |          |
| Beclomethasone          | BCM   | 11.25             | MPL-d <sub>2</sub>                | 467.2                                   | 377.1 (100)                                       | 8      | Neg      |
|                         |       |                   |                                   | ([M+CH <sub>3</sub> COO] <sup>-</sup> ) | 341.0 (50)                                        | 20     |          |
| Triamcinolone acetonide | TCA   | 12.52             | TCA- <sup>13</sup> C <sub>3</sub> | 493.2                                   | 413.2 (100)                                       | 20     | Neg      |
|                         |       |                   |                                   | ([M+CH <sub>3</sub> COO] <sup>-</sup> ) | 337.1 (51)                                        | 20     |          |
| Flunisolide             | FNS   | 13.00             | TCA- <sup>13</sup> C <sub>3</sub> | 493.2                                   | 375.1 (100)                                       | 12     | Neg      |
|                         |       |                   |                                   | ([M+CH <sub>3</sub> COO] <sup>-</sup> ) | 59.2 (44)                                         | 32     |          |
| Fluocinolone acetonide  | FCA   | 14.95             | TCA- <sup>13</sup> C <sub>3</sub> | 511.2                                   | 431.1 (100)                                       | 20     | Neg      |
|                         |       |                   |                                   | ([M+CH <sub>3</sub> COO] <sup>-</sup> ) | 355.1 (57)                                        | 28     |          |
| Fluorometholone         | FML   | 15.85             | TCA- <sup>13</sup> C <sub>3</sub> | 435.2                                   | 58.9 (100)                                        | 16     | Neg      |
|                         |       |                   |                                   | ([M+CH <sub>3</sub> COO] <sup>-</sup> ) | 355.1 (55)                                        | 12     |          |
| Fludrocortisone acetate | FLA   | 15.95             | MPL-d <sub>2</sub>                | 481.2                                   | 421.3 (100)                                       | 8      | Neg      |

| Compound                    | Abbr. | Ret Time<br>(min) | Surrogate<br>Assignment | Prec Ion<br>m/z (Formation)             | Prod Ion <sup>a</sup><br>m/z (RI, %) <sup>b</sup> | CE (V) | ESI Mode |
|-----------------------------|-------|-------------------|-------------------------|-----------------------------------------|---------------------------------------------------|--------|----------|
|                             |       |                   |                         | ([M+CH <sub>3</sub> COO] <sup>-</sup> ) | 59.0 (28)                                         | 28     |          |
| Deflazacort                 | DFZ   | 16.21             | BUD-d <sub>8</sub>      | 500.2                                   | 59.0 (100)                                        | 12     | Neg      |
|                             |       |                   |                         | ([M+CH <sub>3</sub> COO] <sup>-</sup> ) | 440.2 (46)                                        | 8      |          |
| Budesonide                  | BUD   | 16.73             | BUD-d <sub>8</sub>      | 489.2                                   | 357.2 (100)                                       | 12     | Neg      |
|                             |       |                   |                         | ([M+CH <sub>3</sub> COO] <sup>-</sup> ) | 339.2 (26)                                        | 16     |          |
| Fluocinonide                | FLC   | 17.35             | BUD-d <sub>8</sub>      | 553.2                                   | 375.2 (100)                                       | 20     | Neg      |
|                             |       |                   |                         | ([M+CH <sub>3</sub> COO] <sup>-</sup> ) | 355.1 (51)                                        | 24     |          |
| Deoxycorticosterone acetate | DCA   | 17.89             | BUD-d <sub>8</sub>      | 373.2                                   | 97.1 (100)                                        | 28     | Pos      |
|                             |       |                   |                         | ([M-H] <sup>+</sup> )                   | 108.9 (82)                                        | 20     |          |
| Amcinonide                  | AMC   | 18.09             | FTP-d <sub>5</sub>      | 561.2                                   | 357.1 (100)                                       | 16     | Neg      |
|                             |       |                   |                         | ([M+CH <sub>3</sub> COO] <sup>-</sup> ) | 481.2 (21)                                        | 16     |          |
| Clobetasol propionate       | CBP   | 18.20             | FTP-d <sub>5</sub>      | 525.2                                   | 429.2 (50)                                        | 12     | Neg      |
|                             |       |                   |                         | ([M+CH <sub>3</sub> COO] <sup>-</sup> ) | 465.2 (100)                                       | 8      |          |
| Mometasone furoate          | MMF   | 18.33             | FTP-d <sub>5</sub>      | 519.1                                   | 35.2 (100)                                        | 8      | Neg      |
|                             |       |                   |                         | ([M+CH <sub>3</sub> COO] <sup>-</sup> ) | 483 (28)                                          | 12     |          |
| Fluticasone propionate      | FTP   | 18.37             | FTP-d <sub>5</sub>      | 559.2                                   | 413.2 (100)                                       | 24     | Neg      |



| Compound                                              | Abbr.                             | Ret Time<br>(min) | Surrogate<br>Assignment | Prec Ion<br>m/z (Formation)             | Prod Ion <sup>a</sup><br>m/z (RI, %) <sup>b</sup> | CE (V) | ESI Mode |
|-------------------------------------------------------|-----------------------------------|-------------------|-------------------------|-----------------------------------------|---------------------------------------------------|--------|----------|
|                                                       |                                   |                   |                         | ([M+CH <sub>3</sub> COO] <sup>-</sup> ) | 59.0 (80)                                         | 44     |          |
| Beclomethasone dipropionate                           | BDP                               | 18.91             | FTP-d <sub>5</sub>      | 579.2                                   | 34.8 (40)                                         | 16     | Neg      |
|                                                       |                                   |                   |                         | ([M+CH <sub>3</sub> COO] <sup>-</sup> ) | 519.2 (100)                                       | 4      |          |
| Clobetasone butyrate                                  | CBB                               | 19.38             | FTP-d <sub>5</sub>      | 479.2                                   | 71.1 (85)                                         | 24     | Pos      |
|                                                       |                                   |                   |                         | ([M+H] <sup>+</sup> )                   | 42.9 (100)                                        | 56     |          |
| Aldosterone-d <sub>7</sub>                            | ALD-d <sub>7</sub>                | 4.91              | –                       | 366.2                                   | 338.1                                             | 16     | Neg      |
| Prednisone-d <sub>8</sub>                             | PNS-d <sub>8</sub>                | 6.30              | –                       | 425.2                                   | 333.2                                             | 16     | Neg      |
| Hydrocortisone-d <sub>2</sub>                         | HCT-d <sub>2</sub>                | 6.38              | –                       | 423.2                                   | 333                                               | 16     | Neg      |
| Cortisone-d <sub>8</sub>                              | COR-d <sub>8</sub>                | 6.62              | –                       | 427.2                                   | 335.2                                             | 8      | Neg      |
| Methylprednisolone-d <sub>2</sub>                     | MPL-d <sub>2</sub>                | 8.83              | –                       | 435.2                                   | 343.2                                             | 12     | Neg      |
| Betamethasone-d <sub>5</sub>                          | BET-d <sub>5</sub>                | 9.25              | –                       | 456.2                                   | 364.1                                             | 16     | Neg      |
| Dexamethasone-d <sub>4</sub>                          | DEX-d <sub>4</sub>                | 9.82              | –                       | 455.2                                   | 363.1                                             | 16     | Neg      |
| Triamcinolone acetonide- <sup>13</sup> C <sub>3</sub> | TCA- <sup>13</sup> C <sub>3</sub> | 12.52             | –                       | 496.2                                   | 416.1                                             | 16     | Neg      |
| Budesonide-d <sub>8</sub>                             | BUD-d <sub>8</sub>                | 16.70             | –                       | 497.3                                   | 357.1                                             | 12     | Neg      |
| Fluticasone propionate-d <sub>5</sub>                 | FTP-d <sub>5</sub>                | 18.35             | –                       | 564.2                                   | 417.1                                             | 16     | Neg      |

**Table S3** IDLs and MDLs of target corticosteroids in direct injection LC-MS/MS analysis

| <b>Compounds</b> | <b>Surrogate Assignment</b>       | <b>IDLs (pg/L)</b> | <b>MDLs (ng/L)</b> |
|------------------|-----------------------------------|--------------------|--------------------|
| ALD              | ALD-d <sub>7</sub>                | 0.5                | 5                  |
| AMC              | FTD-d <sub>5</sub>                | 0.2                | 1                  |
| BCM              | TCA- <sup>13</sup> C <sub>3</sub> | 0.5                | 5                  |
| BDP              | FTD-d <sub>5</sub>                | 1.0                | 5                  |
| BET              | BET-d <sub>5</sub>                | 0.05               | 1                  |
| BUD              | BUD-d <sub>8</sub>                | 0.2                | 1                  |
| CBP              | FTD-d <sub>5</sub>                | 1.0                | 1                  |
| CBB              | FTD-d <sub>5</sub>                | 0.2                | 2                  |
| CTC              | DEX-d <sub>4</sub>                | 0.2                | 5                  |
| COR              | COR-d <sub>8</sub>                | 1.0                | 2                  |
| DFZ              | TCA- <sup>13</sup> C <sub>3</sub> | 0.5                | 5                  |
| DCA              | FTD-d <sub>5</sub>                | 0.1                | 2                  |
| DEX              | DEX-d <sub>4</sub>                | 0.5                | 1                  |
| FLA              | TCA- <sup>13</sup> C <sub>3</sub> | 0.2                | 5                  |
| FMS              | TCA- <sup>13</sup> C <sub>3</sub> | 2.0                | 1                  |
| FNS              | TCA- <sup>13</sup> C <sub>3</sub> | 0.2                | 2                  |
| FCA              | TCA- <sup>13</sup> C <sub>3</sub> | 1.0                | 5                  |
| FLC              | BUD-d <sub>8</sub>                | 0.2                | 1                  |
| FML              | TCA- <sup>13</sup> C <sub>3</sub> | 2.5                | 5                  |
| FTD              | FTD-d <sub>5</sub>                | 0.2                | 1                  |
| HCT              | HCT-d <sub>2</sub>                | 0.05               | 1                  |
| MPL              | MPL-d <sub>2</sub>                | 2.0                | 1                  |
| MMF              | FTD-d <sub>5</sub>                | 0.05               | 10                 |
| PNL              | PNS-d <sub>8</sub>                | 0.1                | 1                  |
| PNS              | PNS-d <sub>8</sub>                | 0.1                | 2                  |
| TCA              | TCA- <sup>13</sup> C <sub>3</sub> | 0.5                | 2                  |

**Table S4** The  $k_{\text{obs}}$  and corresponding  $R^2$  for CS degradation during UV/ $\text{Cl}_2$  treatmentunder various doses of  $\text{Cl}_2$ 

| CS compound | $\text{Cl}_2 = 0 \text{ mg/L}$ |        | $\text{Cl}_2 = 2.5 \text{ mg/L}$ |        | $\text{Cl}_2 = 5 \text{ mg/L}$ |        |
|-------------|--------------------------------|--------|----------------------------------|--------|--------------------------------|--------|
|             | $k_{\text{obs}}$               | $R^2$  | $k_{\text{obs}}$                 | $R^2$  | $k_{\text{obs}}$               | $R^2$  |
| ALD         | 0.0012                         | 0.9919 | 0.0016                           | 0.9908 | 0.0018                         | 0.991  |
| AMC         | 0.0190                         | 0.8742 | 0.0316                           | 1      | 0.0313                         | 1      |
| BCM         | 0.0017                         | 0.9884 | 0.0013                           | 0.8714 | 0.0016                         | 0.9679 |
| BDP         | 0.0011                         | 0.9566 | 0.0013                           | 0.9001 | 0.0016                         | 0.9679 |
| BET         | 0.0267                         | 1      | 0.0269                           | 1      | 0.0313                         | 1      |
| BUD         | -                              | -      | -                                | -      | -                              | -      |
| CBP         | 0.0254                         | 1      | 0.0243                           | 1      | 0.0256                         | 1      |
| CBB         | 0.0193                         | 1      | 0.0205                           | 1      | 0.0268                         | 1      |
| CTC         | 0.0024                         | 0.9849 | 0.0030                           | 0.9795 | 0.0034                         | 0.9944 |
| COR         | 0.0007                         | 0.9598 | 0.0010                           | 0.9944 | 0.0012                         | 0.9903 |
| DFZ         | -                              | -      | -                                | -      | -                              | -      |
| DCA         | 0.0021                         | 0.9672 | 0.0023                           | 0.9914 | 0.0023                         | 0.9951 |
| DEX         | 0.0238                         | 0.987  | 0.0309                           | 1      | 0.0302                         | 1      |
| FLA         | 0.0012                         | 0.9782 | 0.0010                           | 0.9511 | 0.0012                         | 0.985  |
| FMS         | 0.0153                         | 0.9866 | 0.0159                           | 0.9876 | 0.0169                         | 0.995  |
| FNS         | -                              | -      | -                                | -      | -                              | -      |
| FCA         | 0.0158                         | 0.991  | 0.0172                           | 0.9968 | 0.0175                         | 0.9974 |
| FLC         | 0.0156                         | 0.9859 | 0.0164                           | 0.9914 | 0.0163                         | 0.9902 |
| FML         | 0.0174                         | 0.9967 | 0.0192                           | 1      | 0.0198                         | 1      |
| FTP         | 0.0150                         | 0.9746 | 0.0169                           | 0.9902 | 0.0174                         | 0.994  |
| HCT         | 0.0027                         | 0.9927 | 0.0030                           | 0.9963 | 0.0032                         | 0.9975 |
| MPL         | -                              | -      | -                                | -      | -                              | -      |
| MMF         | 0.0092                         | 0.9686 | 0.0092                           | 0.8902 | 0.0099                         | 0.8984 |
| PNL         | -                              | -      | -                                | -      | -                              | -      |
| PNS         | -                              | -      | -                                | -      | -                              | -      |
| TCA         | 0.0250                         | 1      | 0.0265                           | 1      | 0.0266                         | 1      |

**Table S5** The  $k_{\text{obs}}$  and corresponding  $R^2$  for CS degradation during UV/ $\text{NH}_2\text{Cl}$  treatment under various doses of  $\text{NH}_2\text{Cl}$

| CS compound | $\text{NH}_2\text{Cl} = 0 \text{ mg/L}$ |        | $\text{NH}_2\text{Cl} = 2.5 \text{ mg/L}$ |        | $\text{NH}_2\text{Cl} = 5 \text{ mg/L}$ |        |
|-------------|-----------------------------------------|--------|-------------------------------------------|--------|-----------------------------------------|--------|
|             | k                                       | $R^2$  | k                                         | $R^2$  | k                                       | $R^2$  |
| ALD         | 0.0012                                  | 0.9919 | 0.0017                                    | 0.9969 | 0.0019                                  | 0.9979 |
| AMC         | 0.0190                                  | 0.8742 | 0.0283                                    | 0.9993 | 0.0292                                  | 0.9989 |
| BCM         | 0.0017                                  | 0.9884 | 0.0016                                    | 0.9959 | 0.0018                                  | 0.9979 |
| BDP         | 0.0011                                  | 0.9566 | 0.0013                                    | 0.9703 | 0.0015                                  | 0.9216 |
| BET         | 0.0267                                  | 1      | 0.0266                                    | 0.9998 | 0.0311                                  | 0.9997 |
| BUD         | -                                       | -      | -                                         | -      | -                                       | -      |
| CBP         | 0.0254                                  | 1      | 0.0254                                    | 1      | 0.027                                   | 0.9992 |
| CBB         | 0.0193                                  | 1      | 0.022                                     | 0.9995 | 0.0299                                  | 0.9902 |
| CTC         | 0.0024                                  | 0.9849 | 0.0033                                    | 0.9912 | 0.0038                                  | 0.9911 |
| COR         | 0.0007                                  | 0.9598 | 0.0009                                    | 0.9932 | 0.001                                   | 0.993  |
| DFZ         | -                                       | -      | -                                         | -      | -                                       | -      |
| DCA         | 0.0021                                  | 0.9672 | 0.0021                                    | 0.9959 | 0.0025                                  | 0.9929 |
| DEX         | 0.0238                                  | 0.987  | 0.028                                     | 0.9957 | 0.028                                   | 0.9841 |
| FLA         | 0.0012                                  | 0.9782 | 0.0013                                    | 0.9754 | 0.0016                                  | 0.9729 |
| FMS         | 0.0153                                  | 0.9866 | 0.0147                                    | 0.9978 | 0.0161                                  | 0.9978 |
| FNS         | -                                       | -      | -                                         | -      | -                                       | -      |
| FCA         | 0.0158                                  | 0.991  | 0.0167                                    | 0.9994 | 0.017                                   | 0.9978 |
| FLC         | 0.0156                                  | 0.9859 | 0.0161                                    | 0.9993 | 0.0173                                  | 0.9988 |
| FML         | 0.0174                                  | 0.9967 | 0.0174                                    | 0.9955 | 0.0215                                  | 0.9851 |
| FTP         | 0.0150                                  | 0.9746 | 0.0161                                    | 0.9944 | 0.0167                                  | 0.9959 |
| HCT         | 0.0027                                  | 0.9927 | 0.0032                                    | 0.9979 | 0.0037                                  | 0.9973 |
| MPL         | -                                       | -      | -                                         | -      | -                                       | -      |
| MMF         | 0.0092                                  | 0.9686 | 0.0115                                    | 0.9997 | 0.013                                   | 0.9984 |
| PNL         | -                                       | -      | -                                         | -      | -                                       | -      |
| PNS         | -                                       | -      | -                                         | -      | -                                       | -      |
| TCA         | 0.0250                                  | 1      | 0.0267                                    | 0.9993 | 0.0281                                  | 0.9981 |

**Table S6** The  $k_{\text{obs}}$  and corresponding  $R^2$  for CS degradation during UV/H<sub>2</sub>O<sub>2</sub> treatment under various doses of H<sub>2</sub>O<sub>2</sub>

| CS compound | H <sub>2</sub> O <sub>2</sub> = 0 mg/L |                | H <sub>2</sub> O <sub>2</sub> = 3 mg/L |                | H <sub>2</sub> O <sub>2</sub> = 7 mg/L |                |
|-------------|----------------------------------------|----------------|----------------------------------------|----------------|----------------------------------------|----------------|
|             | k                                      | R <sup>2</sup> | k                                      | R <sup>2</sup> | k                                      | R <sup>2</sup> |
| ALD         | 0.0012                                 | 0.9919         | 0.0016                                 | 0.9905         | 0.0019                                 | 0.9968         |
| AMC         | 0.0190                                 | 0.8742         | 0.0306                                 | 0.9988         | 0.0334                                 | 0.9966         |
| BCM         | 0.0017                                 | 0.9884         | 0.0022                                 | 0.9959         | 0.0025                                 | 0.9847         |
| BDP         | 0.0011                                 | 0.9566         | 0.0018                                 | 0.9545         | 0.0021                                 | 0.9214         |
| BET         | 0.0267                                 | 1              | 0.0260                                 | 1              | 0.0269                                 | 0.9991         |
| BUD         | -                                      | -              | -                                      | -              | -                                      | -              |
| CBP         | 0.0254                                 | 1              | 0.0304                                 | 0.9986         | 0.0321                                 | 0.9977         |
| CBB         | 0.0193                                 | 1              | 0.0191                                 | 0.9998         | 0.0208                                 | 0.9887         |
| CTC         | 0.0024                                 | 0.9849         | 0.0034                                 | 0.9917         | 0.0041                                 | 0.9893         |
| COR         | 0.0007                                 | 0.9598         | 0.0009                                 | 0.9904         | 0.0012                                 | 0.9866         |
| DFZ         | -                                      | -              | -                                      | -              | -                                      | -              |
| DCA         | 0.0021                                 | 0.9672         | 0.0026                                 | 0.9922         | 0.0028                                 | 0.9740         |
| DEX         | 0.0238                                 | 0.987          | 0.0306                                 | 0.9975         | 0.0344                                 | 0.9977         |
| FLA         | 0.0012                                 | 0.9782         | 0.0017                                 | 0.9460         | 0.0020                                 | 0.9267         |
| FMS         | 0.0153                                 | 0.9866         | 0.0179                                 | 0.9953         | 0.0188                                 | 0.9947         |
| FNS         | -                                      | -              | -                                      | -              | -                                      | -              |
| FCA         | 0.0158                                 | 0.991          | 0.0173                                 | 0.9979         | 0.0180                                 | 0.9969         |
| FLC         | 0.0156                                 | 0.9859         | 0.0170                                 | 0.9914         | 0.0185                                 | 0.9904         |
| FML         | 0.0174                                 | 0.9967         | 0.0221                                 | 0.9999         | 0.0238                                 | 0.9994         |
| FTP         | 0.0150                                 | 0.9746         | 0.0176                                 | 0.9960         | 0.0186                                 | 0.9948         |
| HCT         | 0.0027                                 | 0.9927         | 0.0033                                 | 0.9972         | 0.0034                                 | 0.9941         |
| MPL         | -                                      | -              | -                                      | -              | -                                      | -              |
| MMF         | 0.0092                                 | 0.9686         | 0.010                                  | 0.9726         | 0.0119                                 | 0.9521         |
| PNL         | -                                      | -              | -                                      | -              | -                                      | -              |
| PNS         | -                                      | -              | -                                      | -              | -                                      | -              |
| TCA         | 0.0250                                 | 1              | 0.0291                                 | 0.9998         | 0.0315                                 | 0.9994         |
